# Supplementary material for: Long-chain alkanol–alkyl carboxylic acid-based low-viscosity hydrophobic deep eutectic solvents for one-pot extraction of anthraquinones from Rhei Radix et Rhizoma
Source: PubMed Central journal article supplement — J Pharm Anal. 2021 Mar 17;12(1):87–95. doi: 10.1016/j.jpha.2021.03.002 (PMC9073249; doi:10.1016/j.jpha.2021.03.002), 2021-03-17
Supplement: mmc1.pdf [file mmc1.pdf]

# Supplementary information

## Long-chain alkanol–alkyl carboxylic acid-based low-viscosity hydrophobic deep eutectic solvents for one-pot extraction of anthraquinones from *Rhei Radix et Rhizoma*

Anqi Huang<sup>a</sup>, Wenwen Deng<sup>b</sup>, Xiao Li<sup>a</sup>, Qutong Zheng<sup>a</sup>, Xuanxuan Wang<sup>a</sup>, Yuxiu Xiao<sup>a,\*</sup>

<sup>a</sup>Key Laboratory of Combinatorial Biosynthesis and Drug Discovery (Ministry of Education), and Wuhan University School of Pharmaceutical Sciences, Wuhan 430071, China

<sup>b</sup>National III Center for Cellular Regulation and Molecular Pharmaceutics, and school of Bioengineering and Food Science, Hubei University of Technology, Wuhan, Hubei, China

\*Corresponding author at: 185 Donghu Road, Wuchang District, Wuhan 430071, China.

Tel.: +86 27 68759892; Fax: +86 27 68759850.

E-mail address: yuxiuxiao2011@whu.edu.cn, 99783508@qq.com (Y. Xiao).

### Table of the contents

1. Supplementary experimental section: Page S2-Page S6
2. Supplementary results and discussion: Page S6-Page S8
3. Supplementary figures: Fig. S1-Fig. S11, Page S9-Page S17
4. Supplementary tables: Table S1-Table S10, Page S18-Page S26

## 1. Supplementary experimental section

### 21 *Polarity determination*

22 First, 1.25 mM pyrene stock solution was prepared in anhydrous ethanol. A 50  $\mu\text{L}$  of the pyrene  
23 stock solution was added in a 1.5 mL centrifuge tube, followed by vacuum-dried to remove ethanol.  
24 The residual pyrene was dissolved in different solvents (studied nine HDESs, other three reported  
25 HDESs, conventional hydrophilic DESs and organic solvents) under 10 min of ultrasound and 2 min  
26 of vortex. Then, the emission spectrum of the obtained solution was measured by fluorescence  
27 spectrophotometer (Hitachi F-460, Japan) at an excitation wavelength of 335 nm, and the fluorescence  
28 intensity ratio ( $I_1/I_3$ ) of the first peak ( $I_1$ ,  $373.5\pm 0.5$  nm) and the third peak ( $I_3$ ,  $384.5\pm 0.5$  nm) was  
29 defined as the polarity of solvent.

### 30 *Hydrophobicity and water-stability study of HDES*

31 In order to initially explore the hydrophobicity of HDESs, 450  $\mu\text{L}$ , 400  $\mu\text{L}$ , 300  $\mu\text{L}$ , 200  $\mu\text{L}$   
32 and 150  $\mu\text{L}$  of HDES, as well as 150  $\mu\text{L}$ , 200  $\mu\text{L}$ , 300  $\mu\text{L}$ , 400  $\mu\text{L}$ , 450  $\mu\text{L}$  of water  
33 (containing 0.1 mM rhodamine B as indicator) were added in a 1.5 mL centrifuge tube to obtain a  
34 HDES-water mixture at the volume ratio of 3:1, 2:1, 1:1, 1:2, 1:3, respectively. The mixture was  
35 vortexed for 10 min and centrifuged at 6000 rpm for 10 min, and then the appearance phenomenon  
36 was recorded. The hydrophobicity and water-stability of HDESs was further studied by evaluating  
37 mutual solubility of HDES and water. 1 mL of HDES and 1 mL of deionized water were mixed in a 5  
38 mL centrifuge tube and then the mixture was vigorously stirred for 1 h in a magnetic heating agitator  
39 (DragonLab MS-H-Pro+, China). After centrifuging for 10 min at 6000 rpm, the top phase (HDES

40 phase) and bottom phase (water phase) were taken by a pipette and a syringe, respectively. The water  
41 content in the HDES phase was determined by Karl Fischer titration (Metrohm 890 Titrando,  
42 Switzerland). The HDES in the water phase was characterized by <sup>1</sup>H-NMR using d<sub>6</sub>-DMSO as the  
43 deuterated reagent.

#### 44 *Quantification analysis of AQs by HPLC-DAD*

45 The quantification of AQs were performed on a Dionex UltiMate 3000 HPLC system (Thermo  
46 Scientific) equipped with a quaternary pump, a diode array detector and a manual injection system.  
47 The data processing was carried out by Chromeleon 7.10 SR1 software. The separation was carried  
48 out using a Thermo Synchronis C<sub>18</sub> column (250 mm × 4.6 mm, particle size 5 μm) with the column  
49 temperature at 40 °C. The mobile phase was comprised of 0.1% H<sub>3</sub>PO<sub>4</sub> water (A) and methanol (B),  
50 the gradient elution program was as follows: 0-10 min, 70%-75% B; 10-11 min 75%-85% B; 11-30  
51 min 85%-95% B. The flow rate was set at 1.0 mL min<sup>-1</sup>, the detection wavelength was at 254 nm, and  
52 the injection volume was 10 μL.

#### 53 *Experimental design strategy and statistical analysis for extraction optimization*

54 The extraction conditions were first optimized by single-factor design experiment to determine  
55 the values of high and low levels of the extraction factors for Plackett-Burman design (PBD), which  
56 was further conducted to screen out the factors that significantly affect the extraction yield. The  
57 detailed PBD are shown in Table S5. Subsequently, response surface methodology (RSM) combined  
58 with Box-Behnken design (BBD) was adopted to optimize the factors chosen by PBD, namely,  
59 extraction temperature (A), liquid-solid ratio (B) and concentration of HCl (C) at three levels. The

60 established 17-run with five central points BBD project are shown in Table S6 with total AQs yield as  
61 the response.

62 Design Expert version 8.0.6 was used for the design and analysis of PBD and BBD. Besides,  
63 analysis of variance (ANOVA) and the lack-of-fit test were performed to evaluate the accuracy of the  
64 proposed model. All the experiments were carried out in random order and triplicate.

#### 65 *Pharmacopoeia method*

66 A reference RRR sample was prepared according to the method listed in Volume 1 of Chinese  
67 pharmacopoeia [33]. Firstly, 0.15 g of RRR herb powder (65 mesh) was extracted with 25 mL of  
68 methanol by heat-refluxing for 60 min. The obtained solution was cooled to room temperature and  
69 then filtered. After that, 5 mL of the continuous filtrate was drawn, transferred to a flask and evaporated  
70 to dryness. 10 mL of 8% (v/v) HCl solution was then added and the mixed solution was sonicated for  
71 2 min. Subsequently, 10 mL of chloroform was added and the mixture was heated to reflux for 1 h.  
72 After cooling to room temperature, the acid-hydrolyzed solution was transferred to a separation funnel  
73 and extracted three times with 10 mL of chloroform each time. The combined chloroform solution was  
74 evaporated to dryness under reduced pressure. And the residue was dissolved with methanol and  
75 transferred to a 10 mL volumetric flask. Then, methanol was added to the mark. After filtration, the  
76 reference RRR sample was obtained and directly used for detection of AQs by HPLC-DAD.

#### 77 *Solubility determination of AQs in HDESs*

78 The solubility of AQs in nine HDESs, traditional DESs (ChCl–glycerin and ChCl–ethylene  
79 glycol), water and common organic solvents (methanol and ethanol) was determined by fully saturated

80 method with 1,8-dihydroxyanthraquinone (1,8-DHAQ) as a representative of AQs. Excess 1,8-DHAQ  
81 was added to a tested solvent, and the mixture was stirred (500 rpm) at 25°C for 2 h in order to  
82 supersaturate the solvent. After standing and centrifuging (8000 rpm for 10 min) for precipitation, the  
83 supernatant was diluted by mobile phase (95:5 v/v methanol-water) and the concentration of 1,8-  
84 DHAQ was analyzed by HPLC-DAD at wavelength of 254 nm. The standard curve and method  
85 validation results for 1,8-DHAQ analysis are shown in Table S8.

86 *Method validation of C<sub>14</sub> alcohol-UA DES based extraction method with HPLC-DAD for AQs*  
87 *quantification*

88 The method validation was conducted by investigating analytical parameters including specificity,  
89 linear equation, linearity, limit of detection (LOD), limit of quantification (LOQ), precision, accuracy,  
90 and stability. The linear equation was constructed by plotting peak area of each AQ against eight  
91 concentrations of AQs methanol working solutions diluted from the stock solution. The LODs and  
92 LOQs were calculated at a signal to-noise (S/N) ratio of 3 and 10, respectively. The intra-day and inter-  
93 day precision were evaluated by analysis of 0.1 g RRR under the optimal extraction conditions. And  
94 the relative standard deviation (RSD) was credited as an indicator of precision. The accuracy of the  
95 method was assessed by studying the recovery of three concentration levels (low 50%, middle 100%,  
96 high 150%) of the spiked RRR samples. The relative recovery (RR) was calculated by the following  
97 equation:

98 
$$RR\% = \frac{C_{\text{found}} - C_{\text{real}}}{C_{\text{added}}} \times 100\%$$

99 where  $C_{\text{found}}$ ,  $C_{\text{real}}$ ,  $C_{\text{added}}$  (mg/g) refer to the determined concentration of AQs in the spiked RRR, the  
100 concentration of AQs in the unspiked RRR, and the added concentration of AQs into the RRR sample,  
101 respectively. The stability of analytes was investigated by determining the content of analytes in the  
102 HDES phase, which was obtained after one-pot extraction, before and after 24 hours of standing.

## 103 **2. Supplementary results and discussion**

### 104 *Method validation of C<sub>14</sub> alcohol–UA DES based extraction method with HPLC-DAD for AQs* 105 *quantification*

106 The analytical performance of the proposed method for analysis of AQs in RRR was validated,  
107 the representative chromatograms are shown in Fig. S11 and the analytical parameters are summarized  
108 in Table S9 and Table S10. The DES and other extracted components do not interfere with the  
109 determination of five main AQs. The favorable linearity with correlation coefficients (R) higher than  
110 0.9997 is achieved for five AQs within the chosen concentration ranges. The LODs and LOQs range  
111 from 0.008 to 0.018  $\mu\text{g/mL}$  and 0.028 to 0.059  $\mu\text{g/mL}$ , respectively. The RSDs for intra-day and inter-  
112 day precision are lower than 2.37% and 3.75%, respectively. And the recoveries are in the reasonable  
113 range of 86.9-102.6% with RSD less than 3.84%. The stability test exhibits that the analytes are highly  
114 stable in HDESs because no significant difference in analytes content exists before and after 24 h  
115 standing. The results above demonstrate that the method, C<sub>14</sub> alcohol–UA HDES based extraction  
116 coupled with HPLC-DAD, is suitable for quantitative analysis of AQs in RRR sample.

### 117 *Single factor optimization*

118 Nine HDESs were chosen to screen extraction solvents of AQs from RRR sample. As shown in  
119 Fig. S9A, all the nine HDESs showed good extraction performance with total AQs yield more than  
120 19.5 mg/g, but C<sub>14</sub> alcohol-UA showed a relatively higher extraction yield. The reason is that C<sub>14</sub>  
121 alcohol with longer alkyl chain can generate stronger hydrophobic interactions with AQs, and UA with  
122 an olefinic bond may have an extra  $\pi$ - $\pi$  interaction with the benzene ring-containing analytes. Thus,  
123 C<sub>14</sub> alcohol-UA was adopted as extraction solvent for further study.

124 The effect of different extraction methods, i.e. stirring (500 rpm, 60 °C, 60 min), water-bath (60  
125 °C, 60 min), shaking (500 rpm, 60 °C, 60 min) and ultrasound (120 W, 60 °C, 60 min) on the extraction  
126 yield were further investigated. As seen in Fig. S9B, stirring was found as the most effective mean  
127 ( $21.09 \pm 0.17$  mg/g). This is because continuous stirring can make the system be completely mixed, thus  
128 intensify the contact between the extraction solvent and target compounds. Although ultrasound can  
129 promote the contact between the extraction media and analytes to a certain extent, due to the low  
130 density and water-insolubility of HDES, ultrasound cannot achieve sufficient interaction between  
131 HDES, water and plant powder. Considering the best extraction effect as well as simple and convenient  
132 operation features without special extraction equipment, the stirring method was selected for  
133 subsequent research.

134 Extraction time and temperature play the important role in the extraction process of AQs. As seen  
135 in Fig. S9C, the yield of AQs rose up in the first 20 min and then remained unchanged, indicating 20  
136 min of stirring can reach the equilibrium yield of this method. The effect of temperature on extraction  
137 of AQs was investigated with 20 min of stirring. As shown in Fig. S9D, total AQs yield increased  
138 significantly at first, then almost kept consistent with temperature more than 60 °C. This can be

139 explained by the fact that the increasing temperature can not only reduce the viscosity of C<sub>14</sub> alcohol–  
140 UA HDES, but also result in a quicker diffusion of AQs into HDES. Accordingly, 20 min of stirring  
141 and 60 °C of extraction temperature were selected as the optimal conditions.

142 The rise in liquid-solid ratio can increase the concentration difference of analytes between  
143 extraction solvent and raw materials, thereby enhancing the driving force of mass transfer. In this work,  
144 six liquid-solid ratios were investigated and the results (Fig. S9E) suggested the AQs yield increased  
145 apparently as liquid-solid ratio rose up from 5:1 to 10:1, and then reached equilibrium with further  
146 increase. To avoid the waste of DES, 10:1 of liquid-solid ratio was selected as suitable ratio for  
147 extracting AQs.

148 The influence of the concentration of HCl on the yield of total AQs (Fig. S9F) showed that 10%  
149 (w/v) HCl was sufficient to provide the maximum yield, probably because the bound AQs (glycoside  
150 form of free AQs) were totally hydrolyzed. Besides, the acidic environment facilitated AQs to maintain  
151 their molecular form (pK<sub>a</sub> values in Table S1), thus reducing their distribution in the aqueous phase.  
152 Hence, 10% (w/v) was deemed as the optimal HCl concentration.



### 3. Supplementary figures

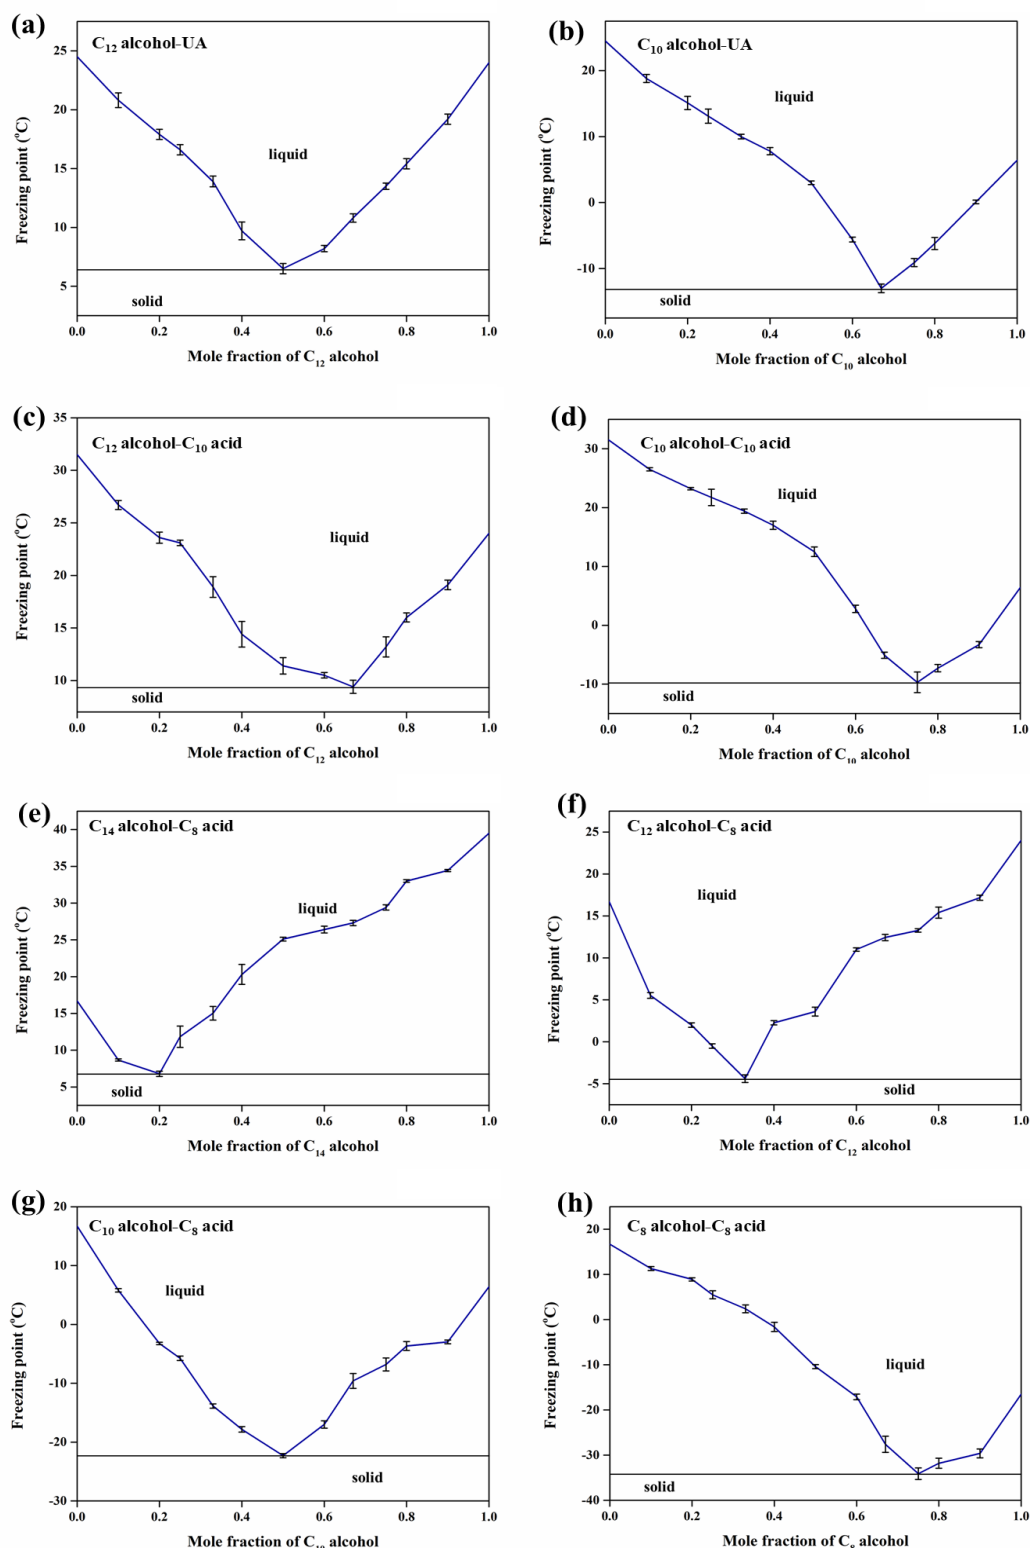

**Fig. S1.** Solid-liquid phase diagrams of  $C_{12}$  alcohol- $UA$  (a),  $C_{10}$  alcohol- $UA$  (b),  $C_{12}$  alcohol- $C_{10}$  acid (c),  $C_{10}$  alcohol- $C_{10}$  acid (d),  $C_{14}$  alcohol- $C_8$  acid (e),  $C_{12}$  alcohol- $C_8$  acid (f),  $C_{10}$  alcohol- $C_8$  acid (g) and  $C_8$  alcohol- $C_8$  acid (h) HDESs, where above the blue curve is the liquid region, below the black line is the solid region.  $UA$ : 10-undecenoic acid.

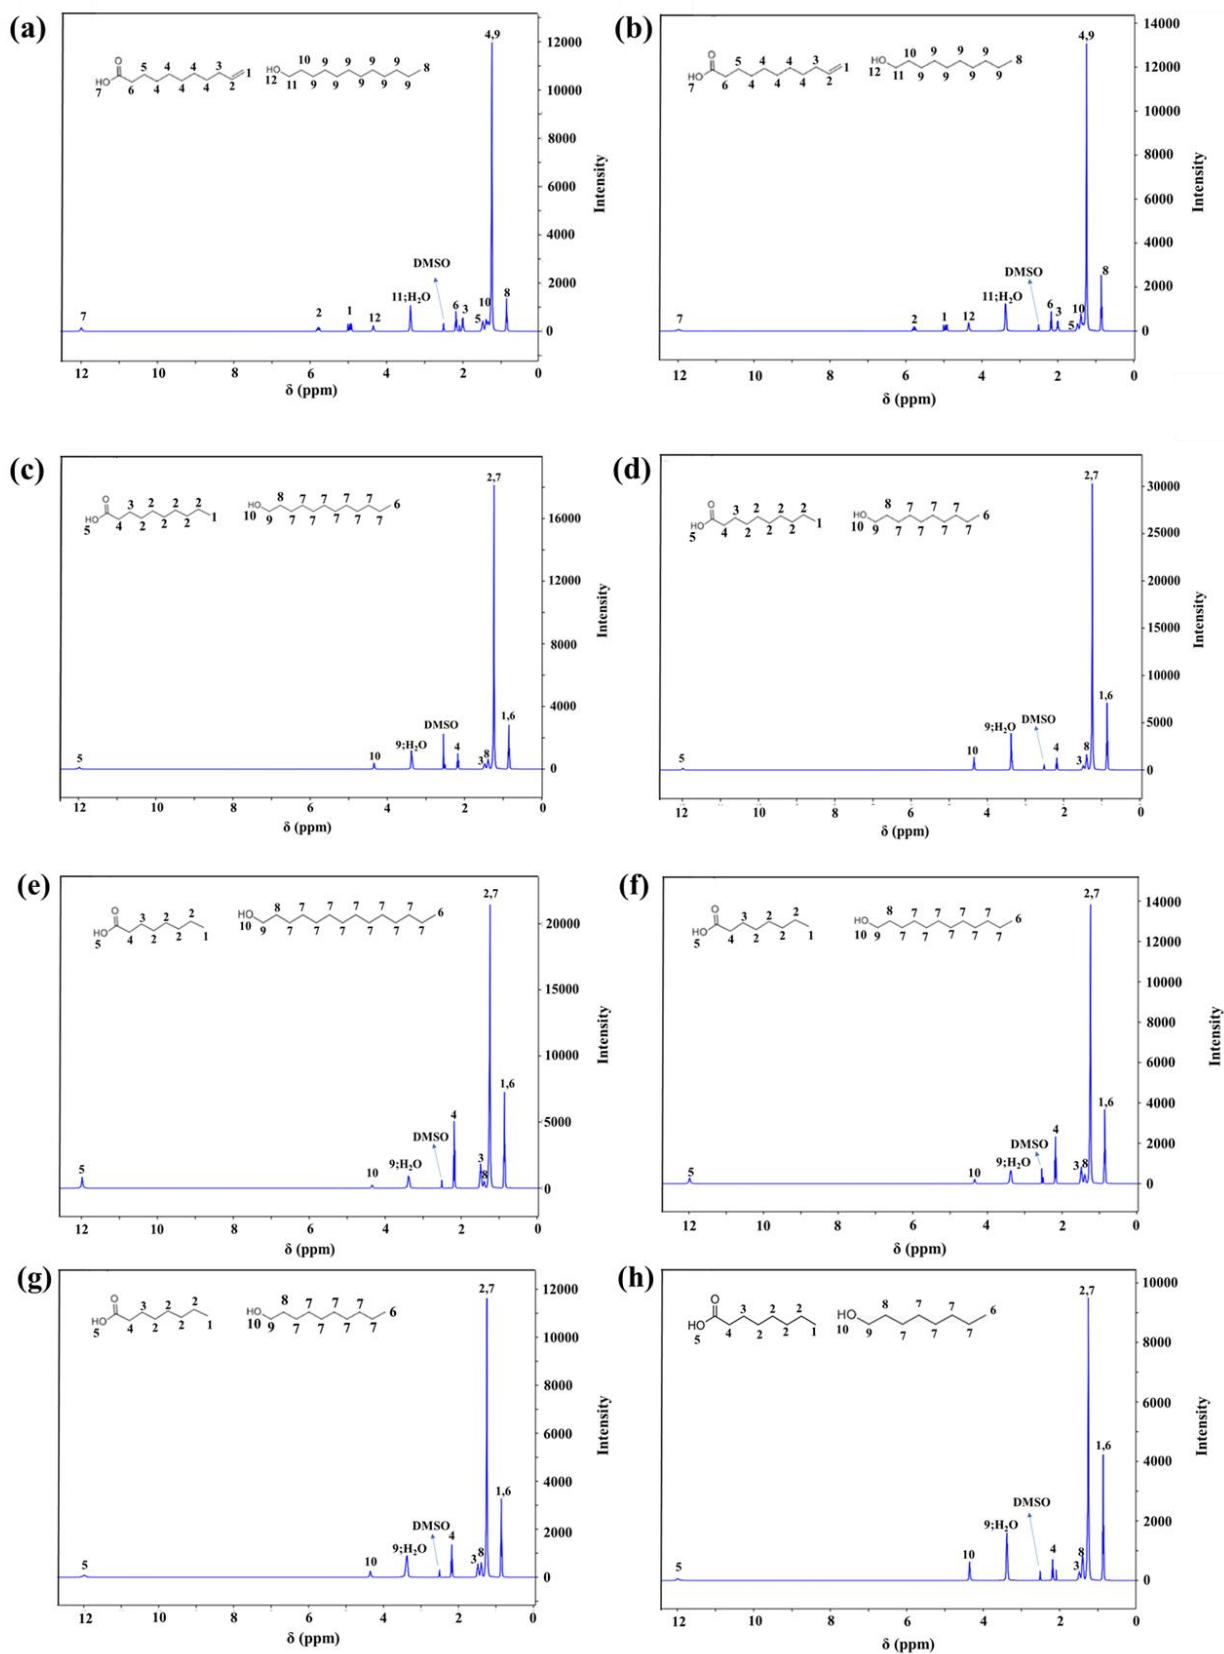

**Fig. S2.**  $^1\text{H}$  NMR spectra of C<sub>12</sub> alcohol-UA (a), C<sub>10</sub> alcohol-UA (b), C<sub>12</sub> alcohol-C<sub>10</sub> acid (c), C<sub>10</sub> alcohol-C<sub>10</sub> acid (d), C<sub>14</sub> alcohol-C<sub>8</sub> acid (e), C<sub>12</sub> alcohol-C<sub>8</sub> acid (f), C<sub>10</sub> alcohol-C<sub>8</sub> acid (g) and C<sub>8</sub> alcohol-C<sub>8</sub> acid (h) HDESs. HBA-HBD mole ratio is at eutectic ratio for each HDES; UA: 10-undecenoic acid.

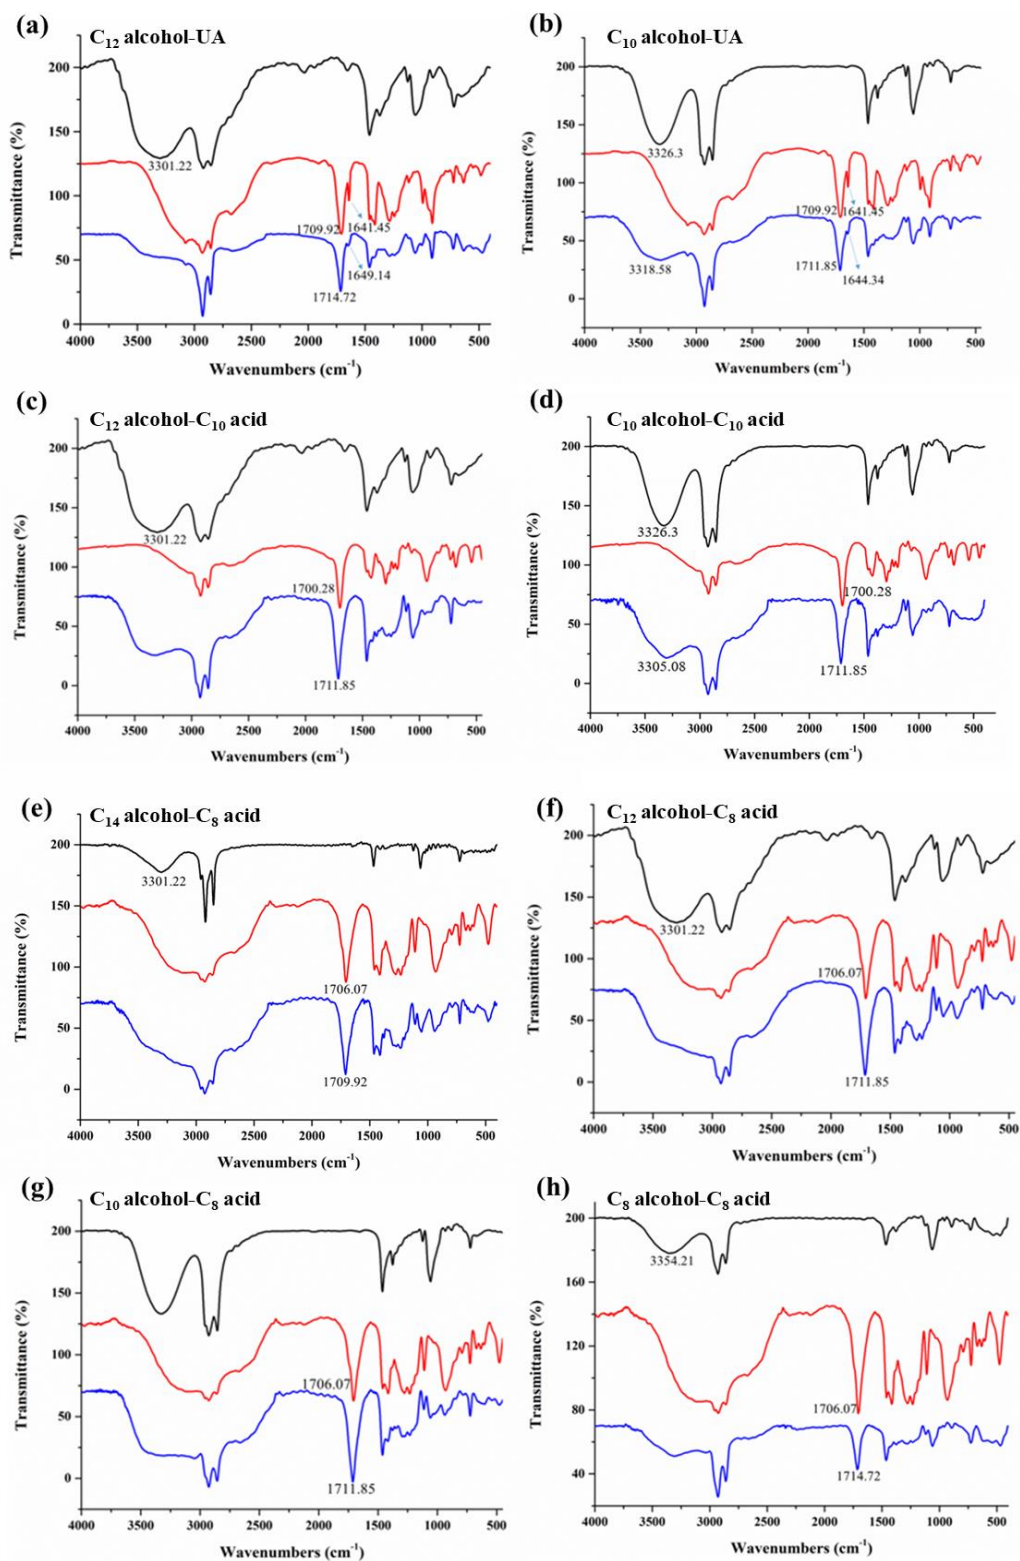

**Fig. S3.** FT-IR spectra of HDESs and their components (a: C<sub>12</sub> alcohol-UA, b: C<sub>10</sub> alcohol-UA, c: C<sub>12</sub> alcohol-C<sub>10</sub> acid, d: C<sub>10</sub> alcohol-C<sub>10</sub> acid, e: C<sub>14</sub> alcohol-C<sub>8</sub> acid, f: C<sub>12</sub> alcohol-C<sub>8</sub> acid, g: C<sub>10</sub> alcohol-C<sub>8</sub> acid, h: C<sub>8</sub> alcohol-C<sub>8</sub> acid), where black lines are pure long chain alkanols, red lines represent pure long chain alkyl carboxylic acids and blue lines refer to corresponding HDESs. HBA-HBD mole ratio is at eutectic ratio for each HDES; UA: 10-undecenoic acid.

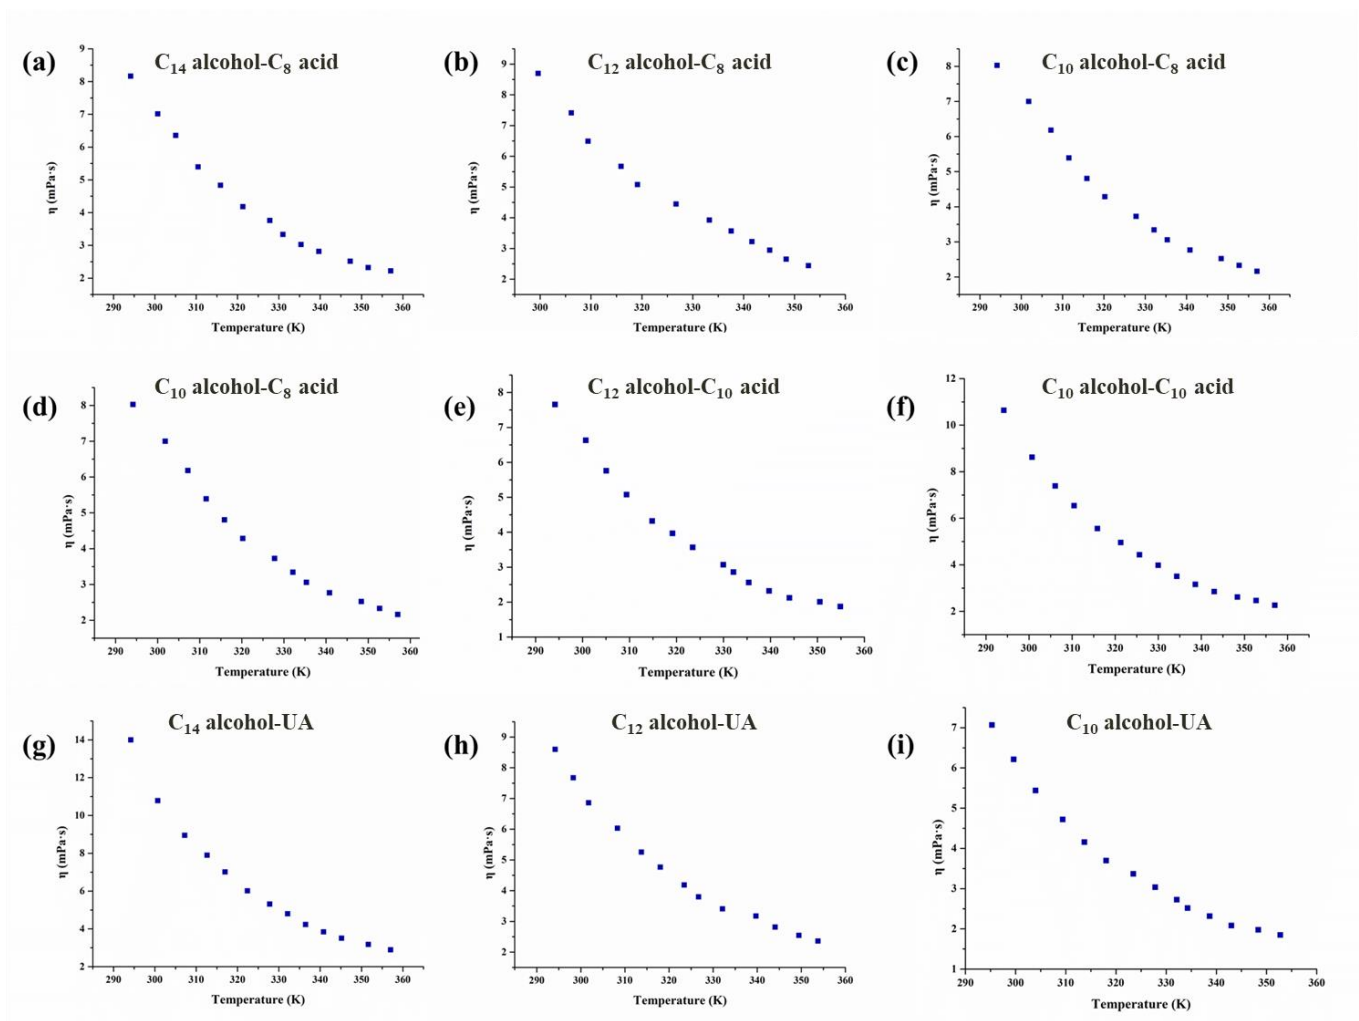

**Fig. S4.** Viscosities of nine HDESs as function of temperature. HBA–HBD mole ratio is at eutectic ratio for each HDES; UA: 10-undecenoic acid.

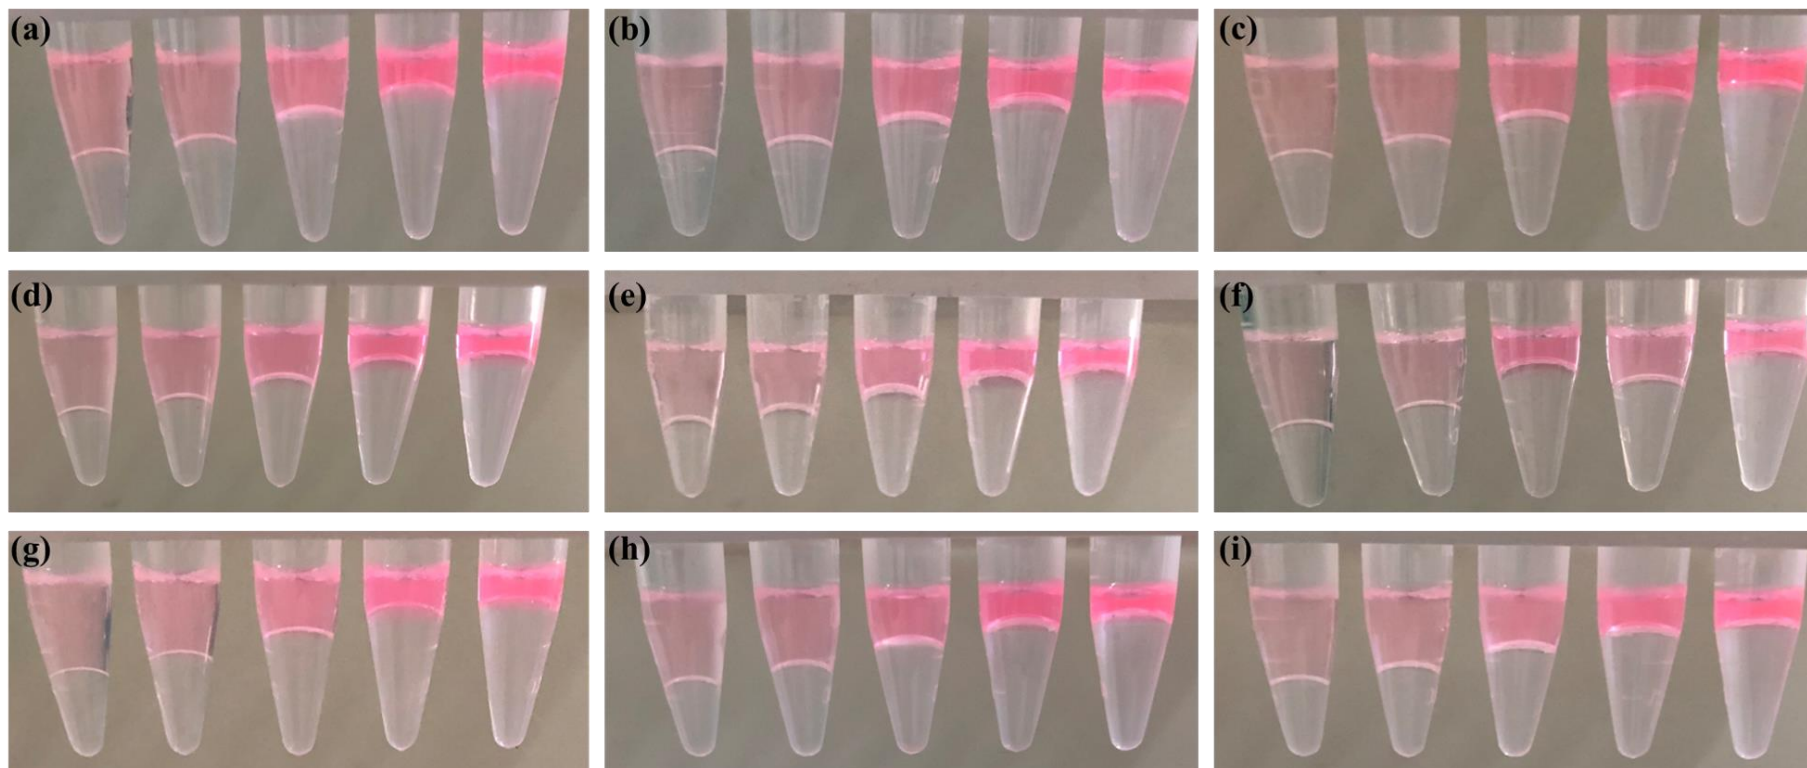

**Fig. S5.** The mixtures of C<sub>14</sub> alcohol–C<sub>8</sub> acid (a), C<sub>12</sub> alcohol–C<sub>8</sub> acid (b), C<sub>10</sub> alcohol–C<sub>8</sub> acid (c), C<sub>8</sub> alcohol–C<sub>8</sub> acid (d), C<sub>12</sub> alcohol–C<sub>10</sub> acid (e), C<sub>10</sub> alcohol–C<sub>10</sub> acid (f), C<sub>14</sub> alcohol–UA (g), C<sub>12</sub> alcohol–UA (h) and C<sub>10</sub> alcohol–UA (i) with water (containing 0.1 mM rhodamine B as indicator) at volume ratio of 3:1, 2:1, 1:1, 1:2 and 1:3 (from left to right) after vortex and centrifugation. HBA-HBD mole ratio is at eutectic ratio for each HDES; UA: 10-undecenoic acid.

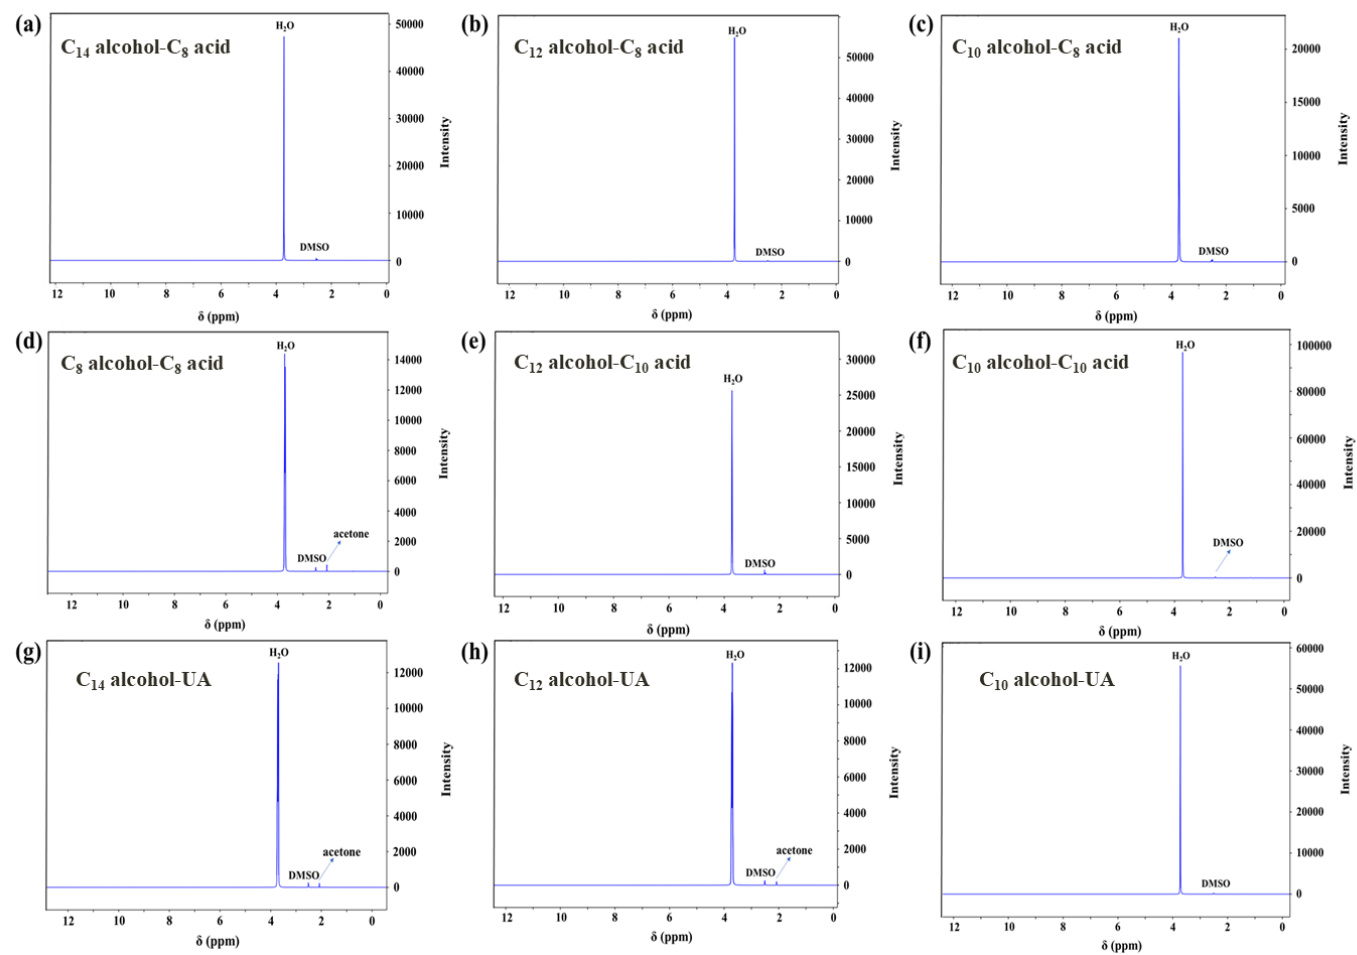

**Fig. S6.**  $^1\text{H}$  NMR spectra of the aqueous phase obtained after HDESs being mixed with water (vortex and centrifugation). HBA–HBD mole ratio is at eutectic ratio for each HDES; UA: 10-undecenoic acid.

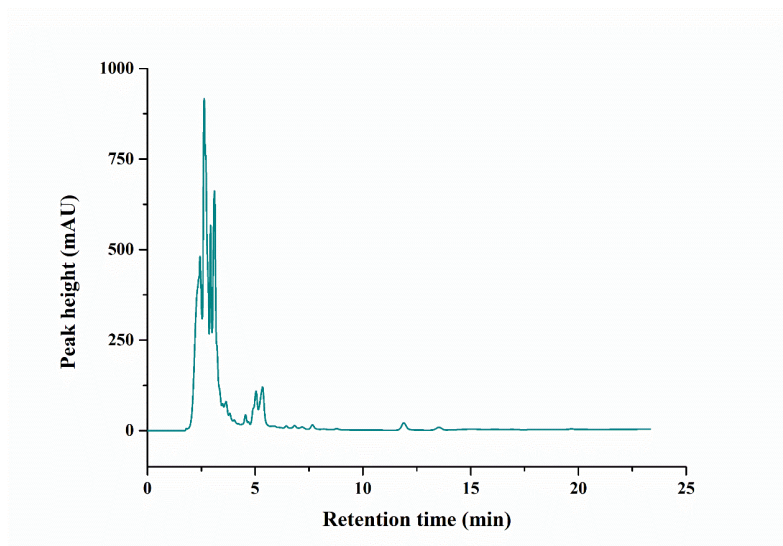

**Fig. S7.** The chromatogram of the aqueous phase obtained after extracting AQs from RRR sample using C<sub>14</sub> alcohol–UA HDES–water two-phase system.

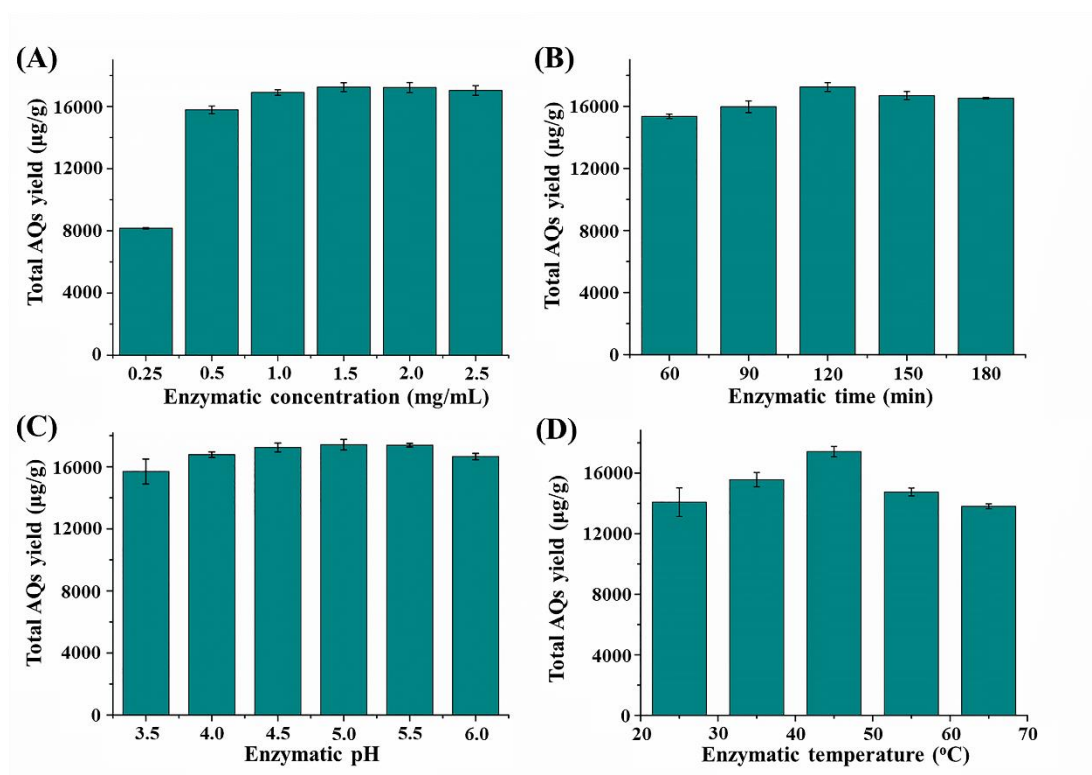

**Fig. S8.** Effect of enzyme concentration (a), enzymatic time (b), enzymatic pH (c), and enzymatic temperature (d) on the total AQs yield.

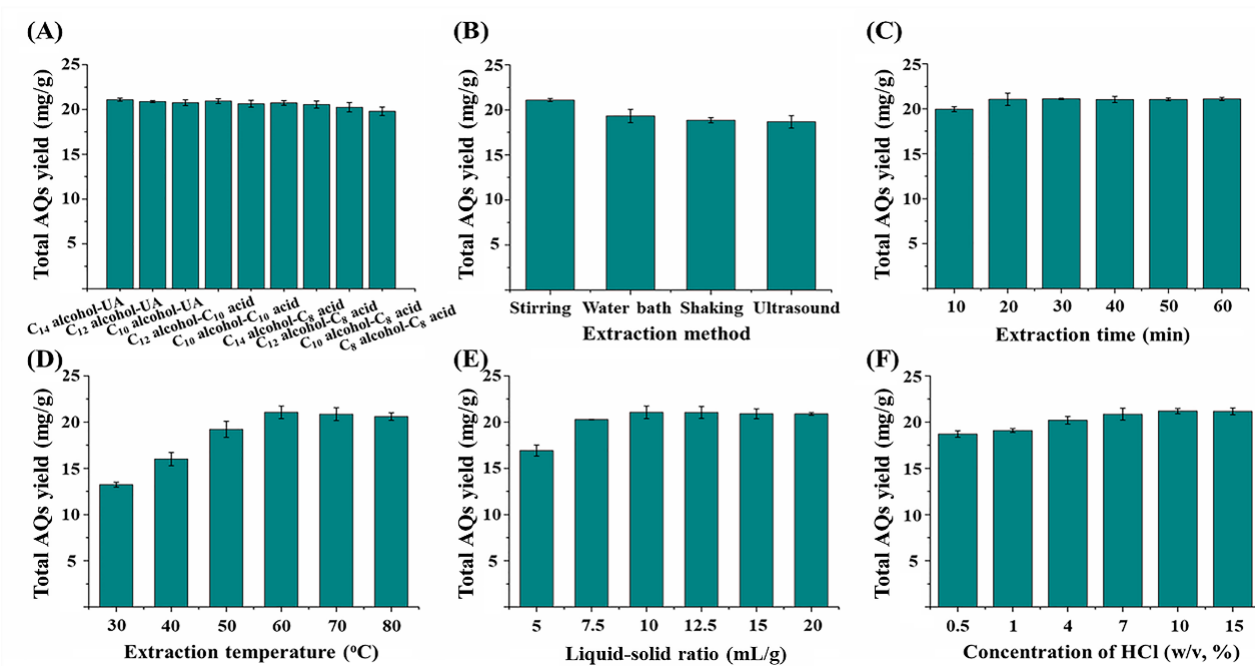

**Fig. S9.** Effects of type of HDESs (A), extraction method (B), extraction time (C), extraction temperature (D), liquid-solid ratio (E), and concentration of HCl (F) on the total AQs extraction yield.

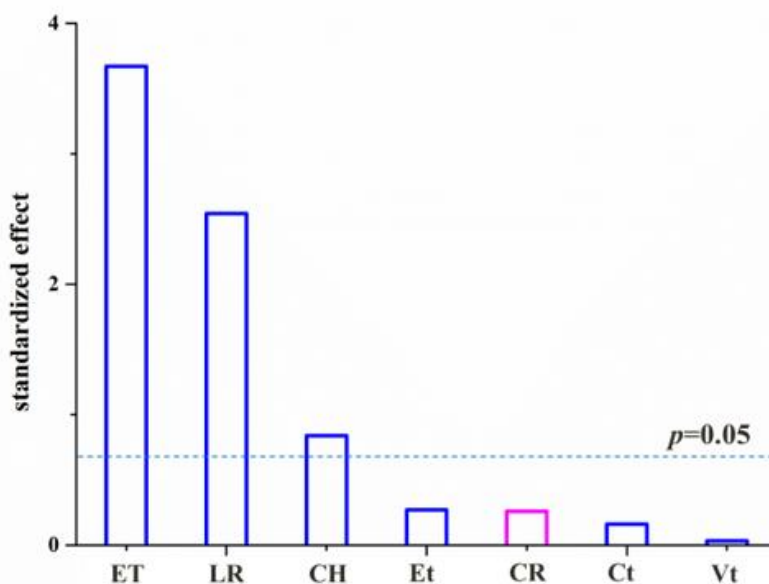

**Fig. S10.** Standardized Pareto chart for Plackett-Burman design. Blue framed columns, positive values; magenta framed column, negative value. The dotted line represents 95% confidence level.



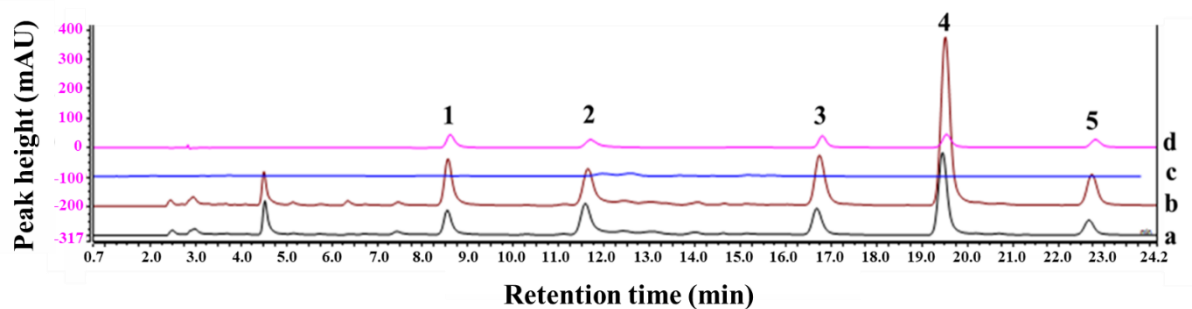

**Fig. S11.** Representative chromatograms: (a) the HDES-rich phase obtained after extraction of AQs from RRR sample; (b) the HDES-rich phase obtained after extraction of AQs from 50% spiked RRR sample; (c) the blank HDES phase; (d) 10  $\mu\text{g/mL}$  standard AQs solution. Peak identification: 1, aloemodin; 2, rhein; 3, emodin; 4, chrysophanol; 5, physcion. HDES:  $\text{C}_{14}$  alcohol–UA (1:4).

## 4. Supplementary tables

**Table S1**

Chemical structures and physical properties of tested AQs.

| AQ           | Chemical structure                                                                  | $\log P^a$  | $pK_a^a$  | HBA <sup>b</sup> | HBD <sup>c</sup> |
|--------------|-------------------------------------------------------------------------------------|-------------|-----------|------------------|------------------|
| Aloe-emodin  | 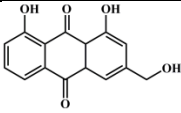   | 3.254±0.915 | 6.30±0.20 | 5                | 3                |
| Rhein        |    | 4.290±0.824 | 3.17±0.20 | 6                | 3                |
| Emodin       |    | 3.641±0.951 | 6.39±0.20 | 5                | 3                |
| Chrysophanol |    | 4.720±0.824 | 6.63±0.20 | 4                | 2                |
| Physcion     |  | 5.078±0.917 | 6.23±0.20 | 5                | 2                |

<sup>a</sup> Data obtained using SciFinder Scholar from Chemical Abstract Service;

<sup>b</sup> HBA = Hydrogen bond acceptor;

<sup>c</sup> HBD = Hydrogen bond donor.

**Table S2**

The initial screening result of HDESs.

|                             | Mole ratio<br>(HBA: HBD) | C <sub>8</sub> alcohol | C <sub>10</sub> alcohol | C <sub>12</sub> alcohol | C <sub>14</sub> alcohol |
|-----------------------------|--------------------------|------------------------|-------------------------|-------------------------|-------------------------|
| C <sub>8</sub> acid         | 1:3                      | ×                      | ✓                       | ✓                       | ✓                       |
|                             | 1:2                      | ×                      | ✓                       | ✓                       | ✓                       |
|                             | 1:1                      | ×                      | ✓                       | ✓                       | ×                       |
|                             | 2:1                      | ✓                      | ✓                       | ✓                       | ×                       |
|                             | 3:1                      | ✓                      | ✓                       | ✓                       | ×                       |
| C <sub>10</sub> acid        | 1:3                      | ×                      | ×                       | ✓                       | ○                       |
|                             | 1:2                      | ×                      | ×                       | ✓                       | ○                       |
|                             | 1:1                      | ×                      | ×                       | ✓                       | ○                       |
|                             | 2:1                      | ×                      | ✓                       | ✓                       | ○                       |
|                             | 3:1                      | ×                      | ✓                       | ✓                       | ○                       |
| 10-undecylenic acid<br>(UA) | 1:3                      | ×                      | ×                       | ✓                       | ✓                       |
|                             | 1:2                      | ×                      | ×                       | ✓                       | ✓                       |
|                             | 1:1                      | ×                      | ✓                       | ✓                       | ✓                       |
|                             | 2:1                      | ×                      | ✓                       | ✓                       | ×                       |
|                             | 3:1                      | ×                      | ✓                       | ✓                       | ×                       |

Black check mark: DES can be formed at room temperature. Red circle: DES can be formed, but it is not a liquid at room temperature.

Red cross: DES cannot be formed. Alkyl carboxylic acid is used as hydrogen bond donor (HBD), and alkanol as HBA (hydrogen bond acceptor).

**Table S3**Fitted parameters of VFT formula and correlation coefficient ( $R^2$ ) for HDESs.

| HDES (HBA–HBD)                               | Mole ratio<br>(HBA:HBD) | $A_\eta$ (mPa s) | $B_\eta$ (K) | $C_\eta$ (K) | $R^2$  |
|----------------------------------------------|-------------------------|------------------|--------------|--------------|--------|
| C <sub>14</sub> alcohol–UA                   | 1:4                     | -3.12            | 954.04       | 127.98       | 0.9985 |
| C <sub>12</sub> alcohol–UA                   | 1:1                     | -3.26            | 1034.52      | 102.91       | 0.9974 |
| C <sub>10</sub> alcohol–UA                   | 2:1                     | -3.40            | 898.36       | 127.80       | 0.9978 |
| C <sub>14</sub> alcohol–C <sub>8</sub> acid  | 1:4                     | -2.99            | 888.76       | 120.69       | 0.9965 |
| C <sub>12</sub> alcohol–C <sub>8</sub> acid  | 1:2                     | -3.68            | 1192.63      | 95.89        | 0.9973 |
| C <sub>10</sub> alcohol–C <sub>8</sub> acid  | 1:1                     | -3.86            | 1277.33      | 81.03        | 0.9958 |
| C <sub>8</sub> alcohol–C <sub>8</sub> acid   | 3:1                     | -3.30            | 869.29       | 134.38       | 0.9964 |
| C <sub>12</sub> alcohol–C <sub>10</sub> acid | 3:2                     | -4.11            | 1191.76      | 101.36       | 0.9952 |
| C <sub>10</sub> alcohol–C <sub>10</sub> acid | 3:1                     | -3.91            | 1190.94      | 104.80       | 0.9986 |

VFT formula:  $\ln\eta = A_\eta + \frac{B_\eta}{T - C_\eta}$ , where  $\eta$  and T represent the viscosity (mPa·s) and temperature (K).

$A_\eta$ ,  $B_\eta$  and  $C_\eta$  are tunable parameters, and the  $A_\eta$  and  $C_\eta$  parameters are corresponding viscosity at maximum temperature and corresponding temperature at maximum viscosity, respectively (B.D. Ribeiro, C. Florindo, L.C. Iff, et al., Menthol-based eutectic mixtures: hydrophobic low viscosity solvents, ACS Sustain. Chem. Eng. 3 (2015) 2469-2477). UA:10-undecylenic acid.

**Table S4**

Water content of DES-rich phase obtained after HDES being mixed with water (1:1 volume ratio).

| HDES (HBA–HBD)                               | Mole ratio (HBA:HBD) | Water content (wt%) |
|----------------------------------------------|----------------------|---------------------|
| C <sub>14</sub> alcohol–UA                   | 1:4                  | 2.136±0.062         |
| C <sub>12</sub> alcohol–UA                   | 1:1                  | 2.841±0.092         |
| C <sub>10</sub> alcohol–UA                   | 2:1                  | 3.149±0.082         |
| C <sub>14</sub> alcohol–C <sub>8</sub> acid  | 1:4                  | 3.269±0.061         |
| C <sub>12</sub> alcohol–C <sub>8</sub> acid  | 1:2                  | 3.413±0.049         |
| C <sub>10</sub> alcohol–C <sub>8</sub> acid  | 1:1                  | 3.679±0.026         |
| C <sub>8</sub> alcohol–C <sub>8</sub> acid   | 3:1                  | 4.413±0.052         |
| C <sub>12</sub> alcohol–C <sub>10</sub> acid | 3:2                  | 3.194±0.254         |
| C <sub>10</sub> alcohol–C <sub>10</sub> acid | 3:1                  | 3.208±0.061         |

UA: 10-undecylenic acid.

**Table S5**

Experimental domain for Plackett-Burman design.

| Factor                 | Unit   | Abbreviation | Low level (-1) | High level (+1) |
|------------------------|--------|--------------|----------------|-----------------|
| Extraction temperature | °C     | ET           | 30             | 60              |
| Extraction time        | min    | Et           | 10             | 30              |
| Liquid-solid ratio     | mL/g   | LR           | 5              | 10              |
| Concentration of HCl   | w/v, % | CH           | 0.5            | 10              |
| Vortex time            | s      | Vt           | 5              | 30              |
| Centrifugal time       | min    | Ct           | 3              | 10              |
| Centrifugal rate       | rpm    | CR           | 3000           | 6000            |

**Table S6**

Experimental design and response values with different combinations of extraction temperature, liquid-solid ratio and concentration of HCl in the Box-Behnken design.

| Run | A: extraction temperature (°C) | B: liquid-solid ratio (mL/g) | C: concentration of HCl (w/v, %) | Response: total AQs yield (mg/g) |
|-----|--------------------------------|------------------------------|----------------------------------|----------------------------------|
| 1   | 55.00                          | 10.00                        | 7.75                             | 21.065                           |
| 2   | 80.00                          | 15.00                        | 7.75                             | 20.290                           |
| 3   | 80.00                          | 10.00                        | 0.50                             | 18.232                           |
| 4   | 80.00                          | 5.00                         | 7.75                             | 18.463                           |
| 5   | 30.00                          | 15.00                        | 7.75                             | 14.836                           |
| 6   | 55.00                          | 10.00                        | 7.75                             | 20.446                           |
| 7   | 80.00                          | 10.00                        | 15.00                            | 20.246                           |
| 8   | 30.00                          | 10.00                        | 15.00                            | 13.864                           |
| 9   | 55.00                          | 5.00                         | 0.50                             | 16.525                           |
| 10  | 55.00                          | 15.00                        | 0.50                             | 18.018                           |
| 11  | 55.00                          | 15.00                        | 15.00                            | 20.124                           |
| 12  | 30.00                          | 5.00                         | 7.75                             | 11.880                           |
| 13  | 55.00                          | 5.00                         | 15.00                            | 17.340                           |
| 14  | 55.00                          | 10.00                        | 7.75                             | 20.665                           |
| 15  | 30.00                          | 10.00                        | 0.50                             | 13.178                           |
| 16  | 55.00                          | 10.00                        | 7.75                             | 20.432                           |
| 17  | 55.00                          | 10.00                        | 7.75                             | 20.364                           |

**Table S7**

ANOVA of the established BBD model.

| Source                | Sum of squares | Degree of freedom     | Mean square            | <i>F</i> value | <i>p</i> value | Prob> <i>F</i>  |
|-----------------------|----------------|-----------------------|------------------------|----------------|----------------|-----------------|
| Model                 | 139.07         | 9                     | 15.45                  | 263.56         | < 0.0001       | significant     |
| <i>A</i>              | 68.88          | 1                     | 68.88                  | 1174.88        | < 0.0001       |                 |
| <i>B</i>              | 10.25          | 1                     | 10.26                  | 175.08         | < 0.0001       |                 |
| <i>C</i>              | 3.95           | 1                     | 3.95                   | 67.36          | < 0.0001       |                 |
| <i>AB</i>             | 0.32           | 1                     | 0.32                   | 5.44           | 0.0525         |                 |
| <i>AC</i>             | 0.44           | 1                     | 0.44                   | 7.59           | 0.0283         |                 |
| <i>BC</i>             | 0.42           | 1                     | 0.42                   | 7.08           | 0.0324         |                 |
| <i>A</i> <sup>2</sup> | 36.00          | 1                     | 36.00                  | 613.97         |                |                 |
| <i>B</i> <sup>2</sup> | 7.15           | 1                     | 7.15                   | 121.96         |                |                 |
| <i>C</i> <sup>2</sup> | 7.00           | 1                     | 7.00                   | 119.31         |                |                 |
| Residual              | 0.41           | 7                     | 0.059                  |                |                |                 |
| Lack of fit           | 0.082          | 3                     | 0.027                  | 0.34           | 0.8019         | not significant |
| Pure error            | 0.33           | 4                     | 0.082                  |                |                |                 |
| Cor total             | 139.48         | 16                    |                        |                |                |                 |
|                       | $R^2=0.9971$   | Adjusted $R^2=0.9933$ | Predicted $R^2=0.9869$ |                |                |                 |

**Table S8**

The standard curve and method validation for HPLC-DAD analysis of 1,8-dihydroxyanthraquinone.

| Analyte                    | Added<br>( $\mu\text{g/mL}$ ) | Intra-day (n=6) |            | Inter-day (n=3) |            | Linear<br>equation (n=8) | Linear range<br>( $\mu\text{g/mL}$ ) | R      | LOD<br>( $\mu\text{g/mL}$ ) | LOQ<br>( $\mu\text{g/mL}$ ) |
|----------------------------|-------------------------------|-----------------|------------|-----------------|------------|--------------------------|--------------------------------------|--------|-----------------------------|-----------------------------|
|                            |                               | Recovery<br>(%) | RSD<br>(%) | Recovery<br>(%) | RSD<br>(%) |                          |                                      |        |                             |                             |
| 1,8-dihydroxyanthraquinone | 5                             | 99.9            | 0.8        | 98.1            | 3.9        | $y=63866x-2216$          | 5-100                                | 0.9998 | 0.0132                      | 0.0440                      |
|                            | 30                            | 100.5           | 0.5        | 100.7           | 1.2        |                          |                                      |        |                             |                             |
|                            | 100                           | 101.1           | 0.15       | 100.8           | 0.4        |                          |                                      |        |                             |                             |



**Table S9**Analytical performance for five AQs analysis by C<sub>14</sub> alcohol–UA DES based extraction method with HPLC-DAD.

| Analyte      | Linearity equation<br>(n=8)                      | Linear range<br>(µg/mL) | R      | LOD<br>(µg/mL) | LOQ<br>(µg/mL) | Intra-day<br>RSD (%)<br>(n=6) | Inter-day<br>RSD (%)<br>(n=3) | Spiked level<br>(mg/g) | Recovery<br>(%) (n=3) | RSD (%) |
|--------------|--------------------------------------------------|-------------------------|--------|----------------|----------------|-------------------------------|-------------------------------|------------------------|-----------------------|---------|
| Aloe emodin  | $y = (0.9684 \pm 0.0122)x + (0.0107 \pm 0.0318)$ | 0.15-40                 | 0.9997 | 0.010          | 0.033          | 2.37                          | 3.75                          | 3.57                   | 97.3                  | 1.37    |
|              |                                                  |                         |        |                |                |                               |                               | 2.38                   | 98.1                  | 0.68    |
|              |                                                  |                         |        |                |                |                               |                               | 1.19                   | 99.6                  | 3.36    |
| Rhein        | $y = (0.7721 \pm 0.0182)x - (0.0024 \pm 0.0777)$ | 0.15-40                 | 1      | 0.018          | 0.059          | 1.01                          | 1.11                          | 6.65                   | 87.1                  | 1.76    |
|              |                                                  |                         |        |                |                |                               |                               | 4.43                   | 86.9                  | 3.53    |
|              |                                                  |                         |        |                |                |                               |                               | 2.22                   | 88.6                  | 2.11    |
| Emodin       | $y = (0.7497 \pm 0.0037)x + (0.0257 \pm 0.0249)$ | 0.15-40                 | 0.9997 | 0.010          | 0.033          | 0.57                          | 1.62                          | 5.65                   | 101.2                 | 2.43    |
|              |                                                  |                         |        |                |                |                               |                               | 3.76                   | 99.4                  | 1.71    |
|              |                                                  |                         |        |                |                |                               |                               | 1.88                   | 99.0                  | 1.20    |
| Chrysophanol | $y = (1.0060 \pm 0.0078)x + (0.0280 \pm 0.0611)$ | 0.15-100                | 0.9999 | 0.008          | 0.028          | 0.65                          | 1.20                          | 12.68                  | 102.3                 | 2.79    |
|              |                                                  |                         |        |                |                |                               |                               | 8.45                   | 102.6                 | 1.02    |
|              |                                                  |                         |        |                |                |                               |                               | 4.22                   | 98.9                  | 3.84    |
| Physcion     | $y = (0.6956 \pm 0.0110)x - (0.0123 \pm 0.0181)$ | 0.15-30                 | 0.9999 | 0.015          | 0.049          | 1.60                          | 2.15                          | 3.74                   | 100.7                 | 0.73    |
|              |                                                  |                         |        |                |                |                               |                               | 2.49                   | 99.1                  | 2.76    |
|              |                                                  |                         |        |                |                |                               |                               | 1.25                   | 99.5                  | 1.12    |

**Table S10**

The stability validation for five AQs analysis by C<sub>14</sub> alcohol–UA DES based extraction method with HPLC-DAD.

| Analyte      | Initial content<br>(mg/g) | RSD (%)<br>(n=3) | Content after 24 h<br>(mg/g) | RSD (%)<br>(n=3) | Relative<br>error (%) |
|--------------|---------------------------|------------------|------------------------------|------------------|-----------------------|
| Aloe-emodin  | 2.41                      | 1.6              | 2.30                         | 1.7              | -4.6                  |
| Rhein        | 4.44                      | 3.5              | 4.35                         | 1.2              | -2.0                  |
| Emodin       | 3.89                      | 0.2              | 3.78                         | 0.3              | -2.8                  |
| Chrysophanol | 8.42                      | 1.9              | 8.47                         | 3.4              | 0.6                   |
| Physcion     | 2.52                      | 1.7              | 2.46                         | 2.6              | -2.4                  |
